# Supplementary material for: Ion Concentration-Dependent Ion Conduction Mechanism of a Voltage-Sensitive Potassium Channel
Source: PubMed Central journal article supplement (PMC3572011; doi:10.1371/journal.pone.0056342), 2013-02-13
Supplement: pone.0056342.s002.pdf [file pone.0056342.s002.pdf]

## Supporting Information Table S1

Numbers of water molecules and ions in each system.

| Ion concentration / mM | 150  | 300  | 450  | 600  |
|------------------------|------|------|------|------|
| Water                  | 9691 | 9645 | 9593 | 9535 |
| K <sup>+</sup>         | 35   | 58   | 84   | 113  |
| Cl <sup>-</sup>        | 27   | 50   | 76   | 105  |
