# Supplementary material for: Ion Concentration-Dependent Ion Conduction Mechanism of a Voltage-Sensitive Potassium Channel
Source: PubMed Central journal article supplement (PMC3572011; doi:10.1371/journal.pone.0056342), 2013-02-13
Supplement: pone.0056342.s003.pdf [file pone.0056342.s003.pdf]

Supporting Information Table S2

| Ion concentration / mM                       | 150 | 300 | 450 | 600 |
|----------------------------------------------|-----|-----|-----|-----|
| IIIr-IV-IIIe-IIIr (*)                        | 9   | 12  | 19  | 55  |
| IIIr-IV-IIIe-IV-IIIe-IIIr (**)               | 0   | 0   | 1   | 3   |
| IIIr-IV-IIIe-IV-IIIe-IV-IIIe-IIIr (***)      | 0   | 0   | 0   | 1   |
| IIIr-IV-IIIr (*)                             | 1   | 0   | 0   | 0   |
| IIIr-IV-IIIe-IIIr-IV-IIIe-IIIr (**)          | 0   | 0   | 1   | 0   |
| IIIr-II-IIIr-IV-IIIe-IIIr (-*)               | 0   | 0   | 1   | 0   |
| IIIr-II-IIIr-IV-IIIe-IIIr-IV-IIIe-IIIr (-**) | 0   | 2   | 0   | 0   |
| IIIr-II-IIIe-IIIr (†)                        | 19  | 16  | 4   | 8   |
| IIIr-II-IIIr-II-IIIe-IIIr (-†)               | 2   | 2   | 1   | 2   |
| IIIr-II-IIIe-IV-IIIe-IIIr (†*)               | 0   | 1   | 0   | 2   |
| IIIr-IV-IIIe-II-IIIe-IIIr (†*)               | 0   | 0   | 0   | 2   |
| IIIr-II-IIIr (-)                             | 5   | 3   | 7   | 10  |
| IIIr-II-IIIr-II-IIIr (--)                    | 0   | 0   | 0   | 2   |
| IIIr-II-IIIr-IIIe-IIIr (-)                   | 1   | 0   | 0   | 0   |
| IIIr (‡)                                     | 1   | 1   | 0   | 1   |
| Total                                        | 38  | 37  | 34  | 86  |

(\*) Knock-on conduction, (†) A/D conduction, (-) back-running, (‡) an exceptional event; an ion comes into the cavity from the intracellular side and it returns to the fluid immediately.
